# Functional Capacity of Shiga-Toxin Promoter Sequences in Eukaryotic Cells

Leticia V. Bentancor<sup>1\*</sup>, Marcos F. Bilen<sup>2</sup>, María P. Mejías<sup>1</sup>, Romina J. Fernández-Brando<sup>1</sup>, Cecilia A. Panek<sup>1</sup>, Maria V. Ramos<sup>1</sup>, Gabriela C. Fernández<sup>1</sup>, Martín Isturiz<sup>1</sup>, Pablo D. Ghiringhelli<sup>2</sup>, Marina S. Palermo<sup>1</sup>

**1** División Inmunología, Instituto de Medicina Experimental (IMEX) (CONICET), Academia Nacional de Medicina, Buenos Aires, Argentina, **2** Laboratorio de Ingeniería Genética y Biología Celular y Molecular, Universidad Nacional de Quilmes, Buenos Aires, Argentina

## Abstract

Shiga toxins (Stx) are the main virulence factors in enterohemorrhagic *Escherichia coli* (EHEC) infections, causing diarrhea and hemolytic uremic syndrome (HUS). The genes encoding for Shiga toxin-2 (Stx2) are located in a bacteriophage. The toxin is formed by a single A subunit and five B subunits, each of which has its own promoter sequence. We have previously reported the expression of the B subunit within the eukaryotic environment, probably driven by their own promoter. The aim of this work was to evaluate the ability of the eukaryotic machinery to recognize *stx2* sequences as eukaryotic-like promoters. Vero cells were transfected with a plasmid encoding Stx2 under its own promoter. The cytotoxic effect on these cells was similar to that observed upon incubation with purified Stx2. In addition, we showed that Stx2 expression in Stx2-insensitive BHK eukaryotic cells induced drastic morphological and cytoskeletal changes. In order to directly evaluate the capacity of the wild promoter sequences of the A and B subunits to drive protein expression in mammalian cells, GFP was cloned under eukaryotic-like putative promoter sequences. GFP expression was observed in 293T cells transfected with these constructions. These results show a novel and alternative way to synthesize Stx2 that could contribute to the global understanding of EHEC infections with immediate impact on the development of treatments or vaccines against HUS.

**Citation:** Bentancor LV, Bilen MF, Mejías MP, Fernández-Brando RJ, Panek CA, et al. (2013) Functional Capacity of Shiga-Toxin Promoter Sequences in Eukaryotic Cells. PLoS ONE 8(2): e57128. doi:10.1371/journal.pone.0057128

**Editor:** Mikael Skurnik, University of Helsinki, Finland

**Received:** August 13, 2012; **Accepted:** January 18, 2013; **Published:** February 22, 2013

**Copyright:** © 2013 Bentancor et al. This is an open-access article distributed under the terms of the Creative Commons Attribution License, which permits unrestricted use, distribution, and reproduction in any medium, provided the original author and source are credited.

**Funding:** This work was supported by PICT 06/591 from the Agencia Nacional de Promoción Científica y Tecnológica, Argentina (to MSP). The funders had no role in study design, data collection and analysis, decision to publish, or preparation of the manuscript. PDG, MSP, GCF, MVR and MFB are members of the Research Career of CONICET (Consejo Nacional de Ciencia y Tecnología).

**Competing Interests:** The authors have declared that no competing interests exist.

\* E-mail: lbentan@unq.edu.ar

These authors contributed equally to this work.

## Introduction

Shiga toxins (Stx) are the main virulence factors in enterohemorrhagic *Escherichia coli* (EHEC) infections, causing diarrhea, hemorrhagic colitis, and hemolytic uremic syndrome (HUS). The infection is associated with the ingestion of contaminated meat or vegetables but is also transmitted by water or even person-to-person contact [1–3]. Sporadic or massive outbreaks have been reported in several developing countries. In Argentina, HUS is endemic and represents a serious public health problem with high morbidity and mortality rates [4,5].

Shiga toxin is a member of the AB<sub>5</sub> family of bacterial toxins. The A subunit (StxA) possesses N-glycosidase activity against 28S rRNA of 60S ribosomes in the cytosol, resulting in inhibition of protein synthesis in eukaryotic cells. The five B subunits (StxB) form a pentamer that binds to globotriaosyl ceramide receptors (Gb<sub>3</sub>) on the cell membrane [6]. Stx-producing *E. coli* (STEC) express two types of Stx proteins (Stx1 and Stx2) and their variants, being Stx2 more virulent and epidemiologically more relevant than Stx1.

In most of the STEC strains identified, the toxin genes, *stxAB*, are located in the genomes of prophages that resemble the coliphage lambda [7]. The lytic phase, which is induced under

stress conditions, leads to an enhancement of Stx2 production and release [8–10]. In this stage, the viral progeny is able to infect other bacteria present in the gut [11,12]. It has been demonstrated that Stx phages can survive even after host death. Moreover, under convenient circumstances, the phage may transduce *in vivo* and *in vitro* other bacteria [13]. In fact, Shiga toxin-converting bacteriophages are able to infect and lysogenize laboratory strains of *E. coli* as well as *E. coli* strains derived from the human intestine [14]. The resulting lysogenic strains are able to produce toxins and infectious phage particles, facilitating the spread of toxin genes among *E. coli* strains and other *Enterobacteriaceae* [14].

On the other hand, different lines of evidence have shown that bacteriophage lambda is able to transduce mammalian cells, and that bacteriophage lambda vectors containing a mammalian gene expression cassette are able to express encoded genes in mammalian target cells *in vitro* [15–17] and *in vivo* [18,19]. The ability of lambda phage particles to transduce mammalian cells *in vivo* depends on the phagocytic and nonphagocytic uptake of the phage, possibly including macropinocytosis, and is increased through an Fc receptor-mediated antibody-dependent mechanism [20].

The interaction between EHEC and macrophages has been reported and it has been shown that phagocytosis of EHEC by

murine macrophages causes actin rearrangements surrounding the phagosome. Intracellularly produced Stx has been shown to be responsible for these effects [21]. In the same line of evidence, a correlation between the *E. coli* O157:H7 phagocytosis by THP-1 human macrophages and the presence of Stx within the cells has been recently described. In addition, *stxA* and *stxB* transcription in infected macrophages and upregulation of SOS response genes (such as *recA*, *recC*, and *recM*) occur simultaneously [22]. We analyzed the hypothesis that, independently of the mechanism through which bacterial *stx* genes are delivered into mammalian cells during EHEC intestinal infection, eukaryotic cells are able to transcribe a functionally active Stx-like protein. In a previous report, BHK cells transfected with a DNA vaccine carrying the wild-type promoters of Stx2 were able to express both subunits. B subunit expression probably reflected the presence of eukaryotic putative promoter-like sequences located upstream of it [23].

Therefore, the aim of this study was to evaluate the ability of the eukaryotic machinery to recognize genetic sequences as *stx2* promoters, to transcribe a Stx2-like protein and produce the functionally active toxin. For this purpose, we designed plasmid constructions using green fluorescent protein (GFP) under putative promoter-like sequences located upstream of the open reading frames (ORFs) of *stxA* and *stxB*, and tested them for GFP expression. In addition, we transfected two eukaryotic cell lines with different sensitivity profiles to Stx2, Vero and BHK cells, with a plasmid construction carrying the *stx2* gene under its own promoter. In both cells we confirmed the Stx2-specific cytotoxic effect.

These results suggest the existence of a new pathway in Stx2 production. In the context of the inflammatory response that takes place in the gut, the phagocytic cells (macrophages and neutrophils) could uptake *stx* genes, produce the active toxin and release it into the bloodstream. Although immune cells may produce low doses of Stx2, they may play an important role in the EHEC pathogenesis and in the global course of infection. In order to develop an efficient procedure for the treatment of EHEC infections, it is necessary to understand the mechanisms involved in the expression of the genes encoding Shiga toxins. In this regard, the present study may open new avenues for the treatment and prevention of HUS.

## Results

### *In silico* Analysis

We analyzed the whole sequence of *stx2* including the promoter region by means of several softwares to find putative eukaryotic promoter sequences. Seven putative eukaryotic promoter-like sequences were computationally detected (Figure 1). Based on their position, pr1 and pr7 putative promoter sequences were additionally analyzed to find transcription factor binding sites. The pr1 sequence contains five eukaryotic transcription factor binding sites, MEB-1, GATA-1, TATA box, Sp1 and NF-1, whereas the pr7 sequence contains three eukaryotic transcription factors binding sites, TEF, TATA box and HNF-3B. The protein factors that bind to these sequences could act together with RNA polymerase to initiate a transcriptional process [24].

### Pr1 and Pr7 Sequences are Recognized by Eukaryotic Cells

The pr1 and pr7 sequences were selected to further analyze the promoter activity in the eukaryotic environment. The pr1-eGFP and pr7-eGFP reporter plasmids were constructed to test whether the prokaryotic sequences could drive the transcription of the *gfp* gene (Figure 2). These plasmids were used in circular and

linearized forms and pEGFP-N3 and  $\Delta$ pr-eGFP were used as positive and negative controls, respectively.

293T cells were transfected with the constructions and GFP expression was analyzed by fluorescence microscopy. We observed GFP expression when cells were transfected with pr1-eGFP (Figure 3, panel B) or pr7-eGFP (Figure 3, panel C). In contrast, no fluorescence was detected when 293T cells were transfected with the  $\Delta$ pr-eGFP plasmid (Figure 3, panel A). In addition, GFP expression was observed when cells were transfected with the linearized forms of pr1-eGFP or pr7-eGFP (Figure 4 panels B and C respectively). These results demonstrate that pr1 and pr7 are the sequences used by mammalian to drive GFP expression.

To evaluate the relevance of TATA box present at pr1 and pr7 sequence, a mutational assay was done. The six nucleotides of the TATA box core were replaced by a BamHI restriction site giving pr1 $\Delta$ TATA-eGFP or pr7 $\Delta$ TATA-eGFP [Figure 2]. GFP expression was not observed when 293T cells were transfected with pr1 $\Delta$ TATA-eGFP or pr7 $\Delta$ TATA-eGFP (Figure S1, panels A and B respectively), suggesting that this sequence plays a critical role in the promoter activity of the putative promoters.

### Eukaryotic Cells Transfected with pStx2 are Able to Express Stx2 Protein

To evaluate the expression of the Stx2 protein in the eukaryotic environment, Vero cells were transfected with pStx2, and intracytoplasmic Stx2 was revealed after 48 hours by an indirect immunofluorescence assay using a polyclonal anti-Stx2 antibody (Figure 5). Cells incubated with Stx2 (Figure 5, C/D) or cells transfected with pStx2 (Figure 5, E/F) shown similar specific staining. No fluorescence was detected in Vero cells without treatment (Figure 5A) or transfected with the empty plasmid (Figure 5B).

### Stx2 Expressed by Eukaryotic Cells is Biologically Active

We then evaluated the Stx2-specific cytotoxicity after pStx2-transfection of Vero cells, as a representative Stx2-susceptible cell line. Cells incubated with purified Stx2 and cells transfected with the empty plasmid were used as positive and negative controls, respectively. Non treated cells were also analyzed.

After 48 hours, Vero cells transfected with pStx2 (Figure 6C) showed a similar cytotoxicity to that of cells incubated with 1 CD50 of purified Stx2 (Figure 6D). No cytotoxic effects were observed in non-treated Vero cells (Figure 6A) or transfected with control plasmid (Figure 6B).

In order to further analyze the cytotoxicity induced by pStx2, non-treated (naïve) Vero cells were incubated for 48 hours with supernatants or cellular extracts derived from Vero cells transfected with pStx2, or with the empty plasmid as control. Both the supernatants and cellular extracts obtained from pStx2-transfected cells showed cytotoxic effect on naïve Vero cells (Figure 7). No cytotoxicity was observed in non-treated Vero cells or Vero cells incubated with supernatants or extracts from Vero cells transfected with the control plasmid. Significant neutralization of the cytotoxic activity was observed when supernatants or cellular extracts were incubated with mouse polyclonal anti-Stx2 antibodies, confirming that the cytotoxicity was specifically induced by Stx2 (Figure 7). To rule out cryptic promoter activity in the pGEMT backbone, pStx2 was digested with EcoRI and the fragment containing *stx2* coding sequence alone was gel purified and used to transfect Vero cells. After 48 hours, Vero cells transfected with the linear DNA still showed cytotoxicity. However, quantification of cytotoxicity revealed that it was two-fold less cytotoxic than its counterpart pStx2 (data not shown).

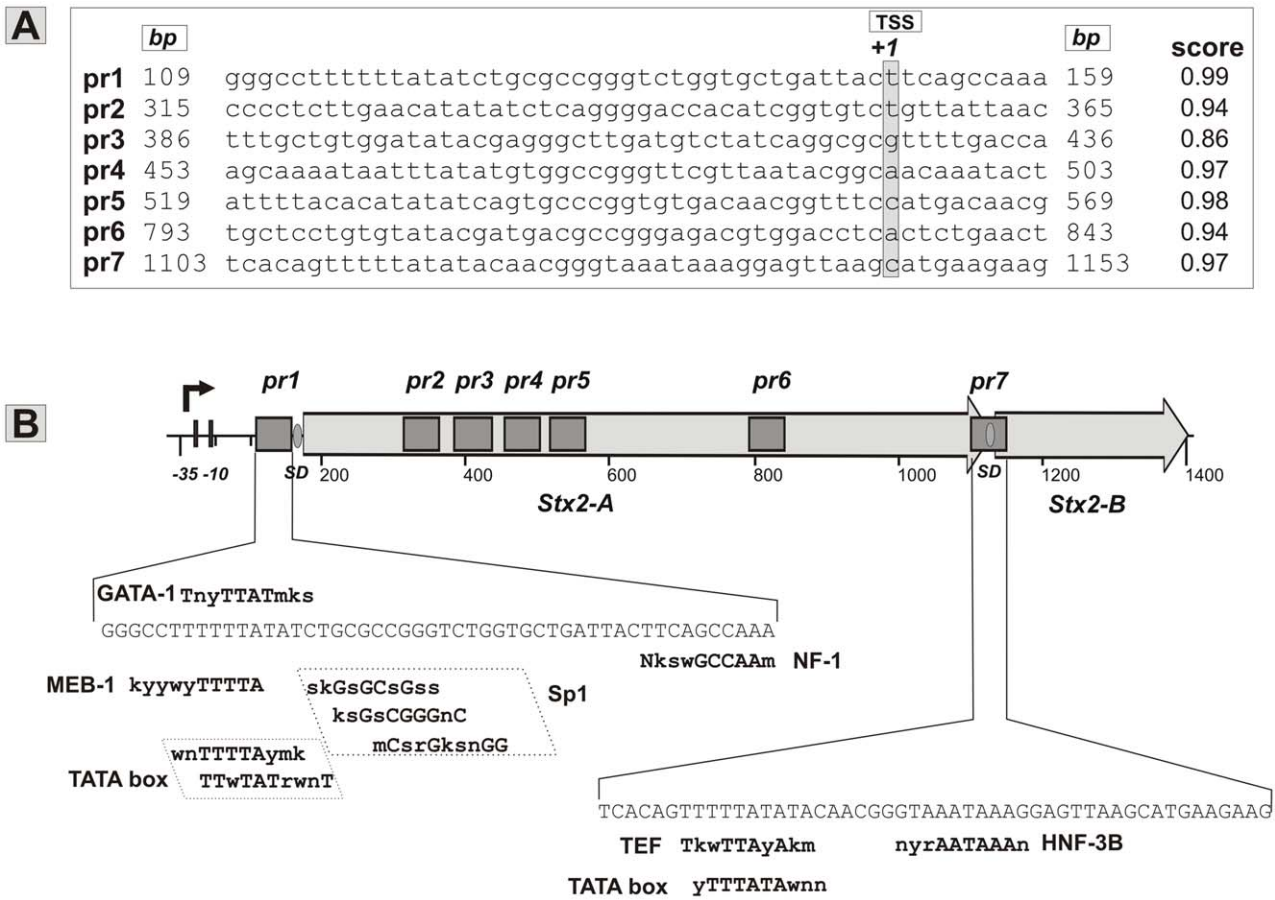

**Figure 1. *In silico* analysis of the *stx2* sequence.** A. Seven regions (pr1-7) with high score for putative eukaryotic promoter sequences were found. The putative transcription start site (TSS, +1) detected with promoter prediction server is highlighted in gray B. The pr1-pr7 regions are indicated with dark gray boxes over the *stx2* gene. Putative mammalian transcription factor binding sites are indicated on the corresponding sequences of the pr1 and pr7 regions.  
doi:10.1371/journal.pone.0057128.g001

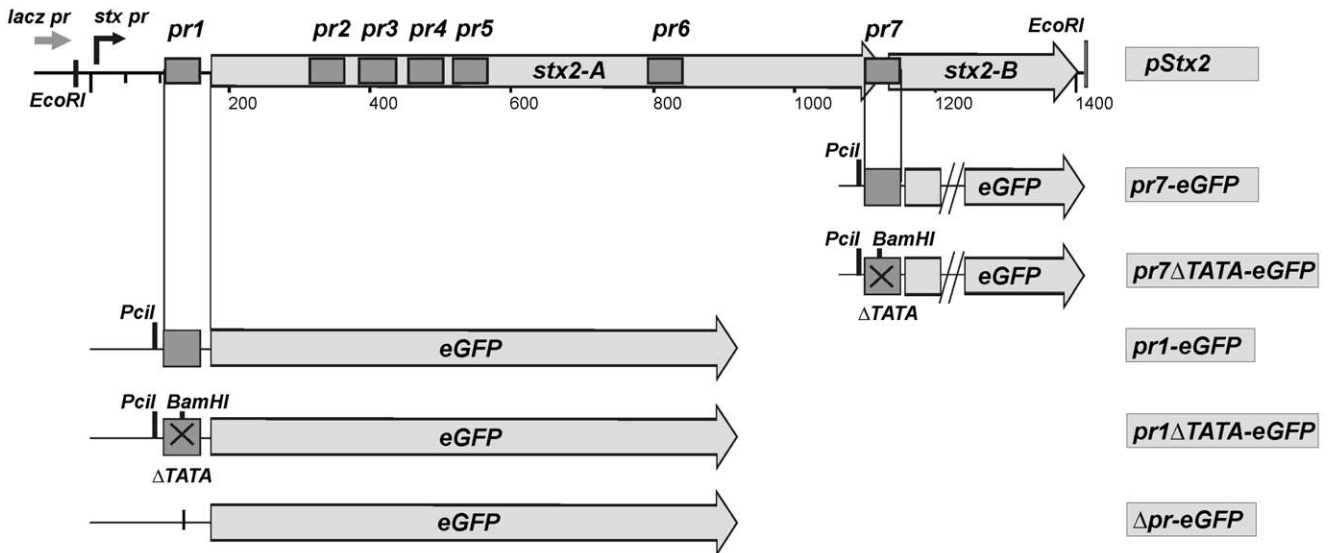

**Figure 2. Recombinant plasmid constructs.** pStx2 is the pGEM-T plasmid with the *stx2* locus cloned in the same direction that *lacZ* promoter. pr1-eGFP and pr7-eGFP are reporter plasmids with the region pr1 or pr7 driving eGFP expression, and Δpr-eGFP is a construction lacking the wild CMV promoter and was used as negative control. Linear pr1-eGFP and pr7-eGFP were obtained after digestion with PciI. In pr1ΔTATA-eGFP and pr7ΔTATA-eGFP TATA Box sequence has been replaced by BamHI restriction site. *Stx2* linear DNA was obtained after digestion with EcoRI.  
doi:10.1371/journal.pone.0057128.g002

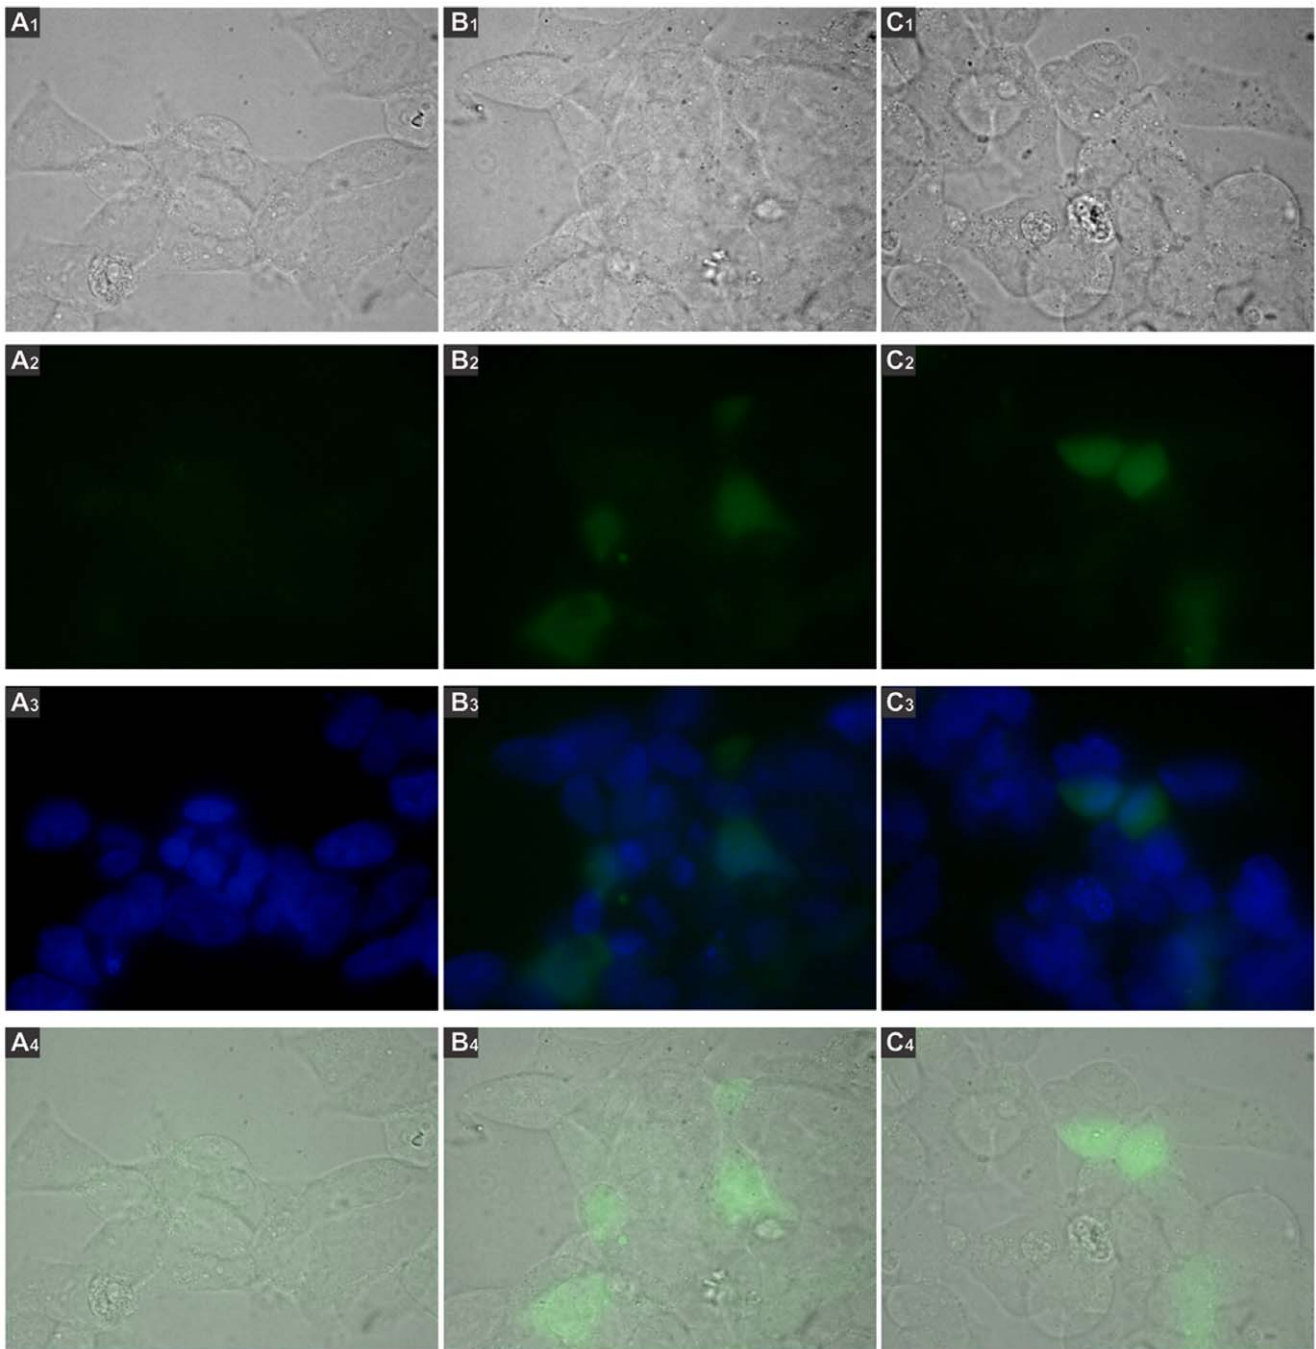

**Figure 3. GFP activity driven by the pr1 or pr7 regions.** 293 T cells were transfected with plasmids pr1-eGFP, pr7-eGFP or  $\Delta$ pr-eGFP, incubated for 48 h and analyzed by fluorescence microscopy using the Nikon Eclipse TE2000 microscope equipped with a CCD camera, with 1000X magnification. Green fluorescence photos were taken with 400 ms of exposure and 3.2 of gain. Numbers 1, 2, 3, 4 correspond to images visualized with white light, green filter, merge between DAPI and green filter and merge between white light and green filter, respectively. **A.** Cells transfected with the  $\Delta$ pr-eGFP plasmid. **B.** Cells transfected with pr1-eGFP. **C.** Cells transfected with pr7-eGFP.  
doi:10.1371/journal.pone.0057128.g003

### Stx2 Expressed by BHK Cells Induces Morphological Changes

BHK cells transfected with pStx2 showed morphological alterations and changes in their growth as evaluated by optical microscopy. BHK cells transfected with pStx2 increased their intracellular spaces and the cells became rounder and smaller. However, cells transfected with the control plasmid or non-treated cells did not show morphological changes. To further analyze

pStx2 effects on actin and nucleic acids on BHK cells, fluorescence assays were performed using phalloidin-TRITC and DAPI, respectively. Cytoskeleton changes were observed 48 hours after transfection. pStx2-transfected BHK cells showed filopodia-like and lamellipodia-like structures (Figure 8D), as Takenouchi and collaborators previously reported in ACHN cells treated with Stx1B [25].



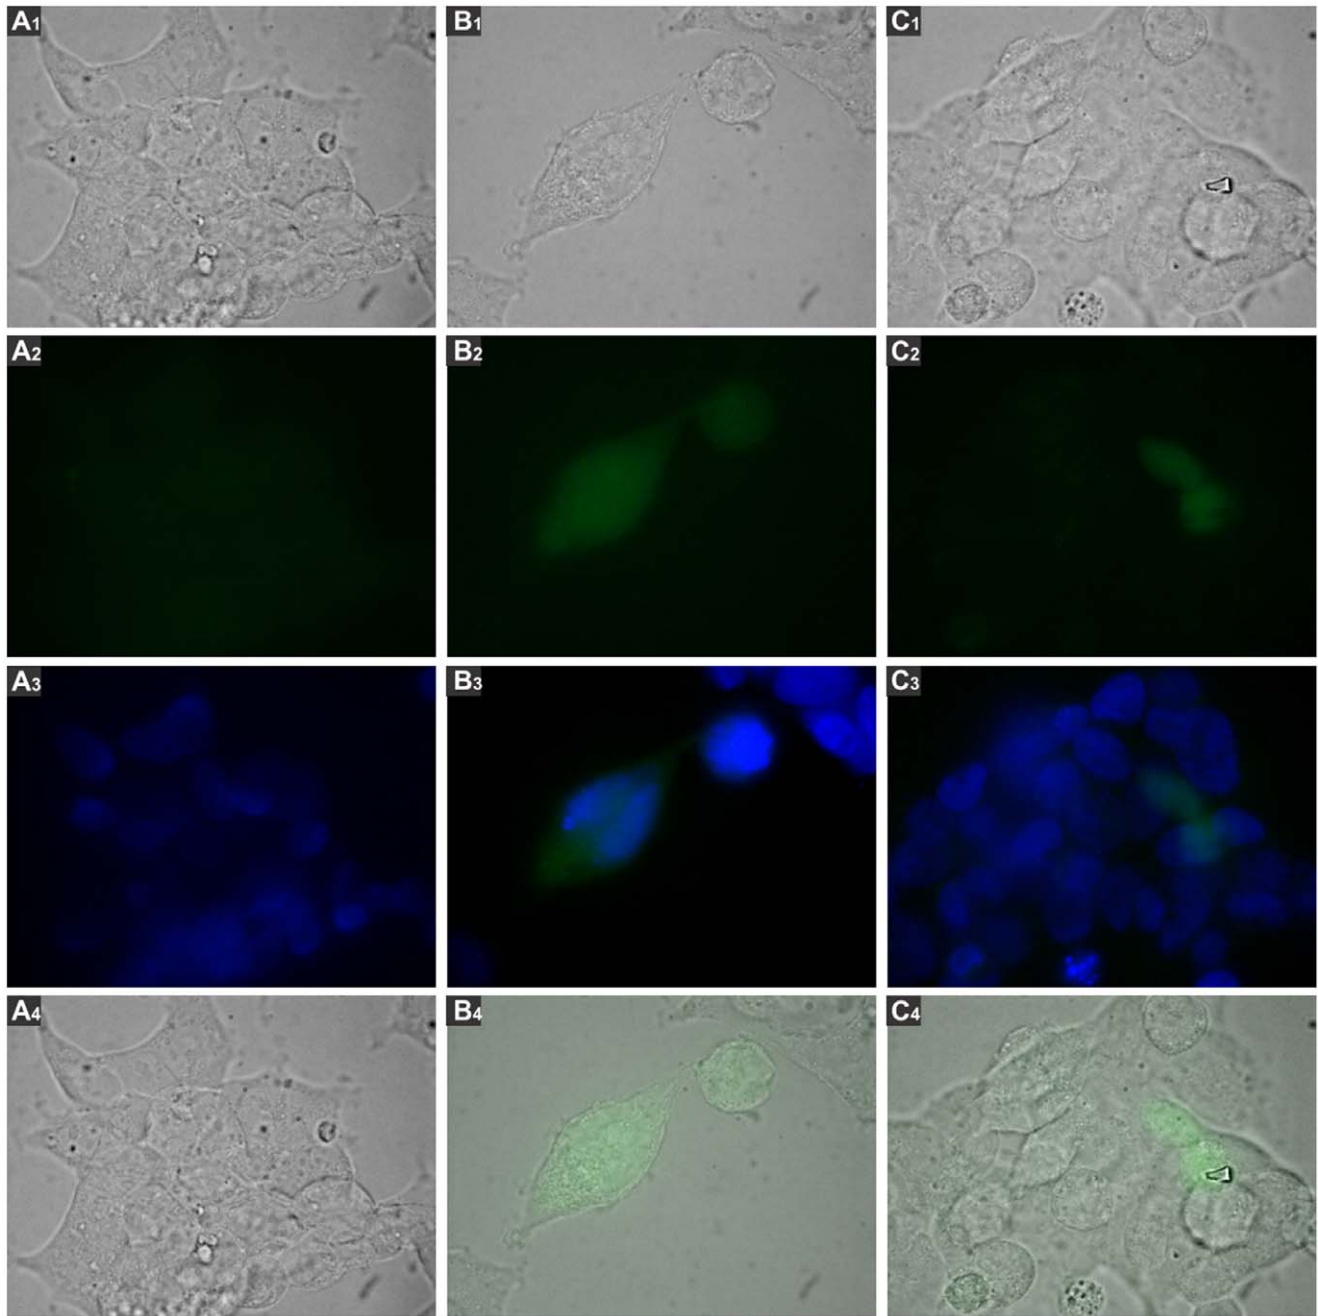

**Figure 4. GFP activity driven by linear reporter plasmid.** 293 T cells were transfected with pr1-eGFP or pr7-eGFP linearized with PciI restriction enzyme. After 48 h, cells were analyzed by fluorescence microscopy using Nikon Eclipse TE2000 microscope equipped with a CCD camera, using 1000X magnification. Green fluorescence photos were taken with 400 ms of exposure and 3.2 of gain. Numbers 1, 2, 3, 4 correspond to images visualized with white light, green filter, merge between DAPI and green filter and merge between white light and green filter, respectively. **A.** 293 T cells transfected with the  $\Delta$ pr-eGFP plasmid. **B.** Cells transfected with linear pr1-eGFP. **C.** Cells transfected with linear pr7-eGFP.  
doi:10.1371/journal.pone.0057128.g004

We did not observe these effects in BHK cells without treatment (Figure 8A) or in those transfected with the control plasmid (Figure 8B). No effect was observed in BHK cells incubated with Stx2 (Figure 8C).

#### Transduction of THP-1 Cells Differentiated to Macrophages by Bacteriophage 933W

To analyze the hypothesis that 933W bacteriophage is able to transduce mammalian cells *in vivo*, THP-1 cells PMA-differen-

tiated to macrophages were incubated with purified 933W bacteriophage in which *stx2* gene was replaced by *gfp* sequence ( $\phi\Delta$ TOX-GFP) [14]. We observed GFP expression when macrophages were incubated with  $\phi\Delta$ TOX-GFP (Figure 9, panel A). No fluorescence was observed in non-treated macrophages (Figure 9, panel B).

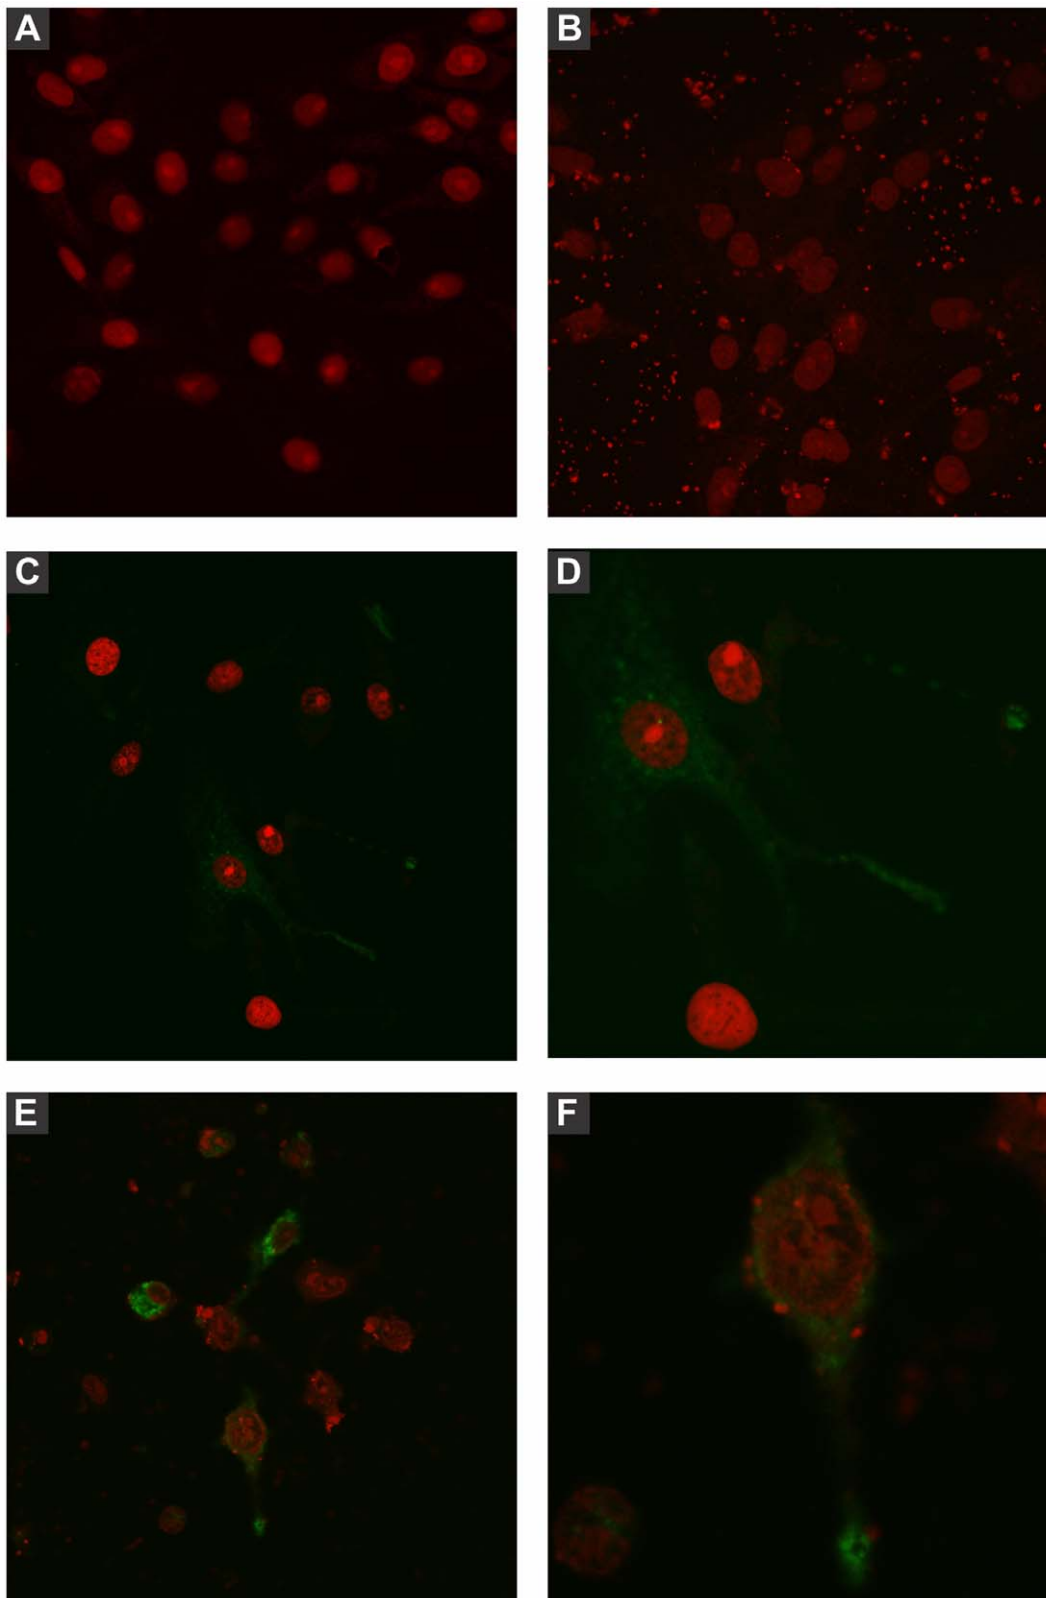

**Figure 5. Immunofluorescence assay of Vero cells incubated with Stx2.** Cells were incubated with purified Stx2 (100 CD50) or transfected with the pStx2 plasmid and stained with propidium iodide. Presence of Stx2 was detected with polyclonal anti-Stx2 serum and FITC-conjugated goat anti-mouse antibody, and analyzed by confocal microscopy. Original magnification 600X. **A:** Non-treated Vero cells. **B:** Cells transfected with the pGEM-T vector alone. **C:** Cells incubated with purified Stx2. **D:** Digital zoom (3.5X) of picture C. **E:** Cells transfected with pStx2. **F:** Digital zoom (3.5X) of picture E.

doi:10.1371/journal.pone.0057128.g005

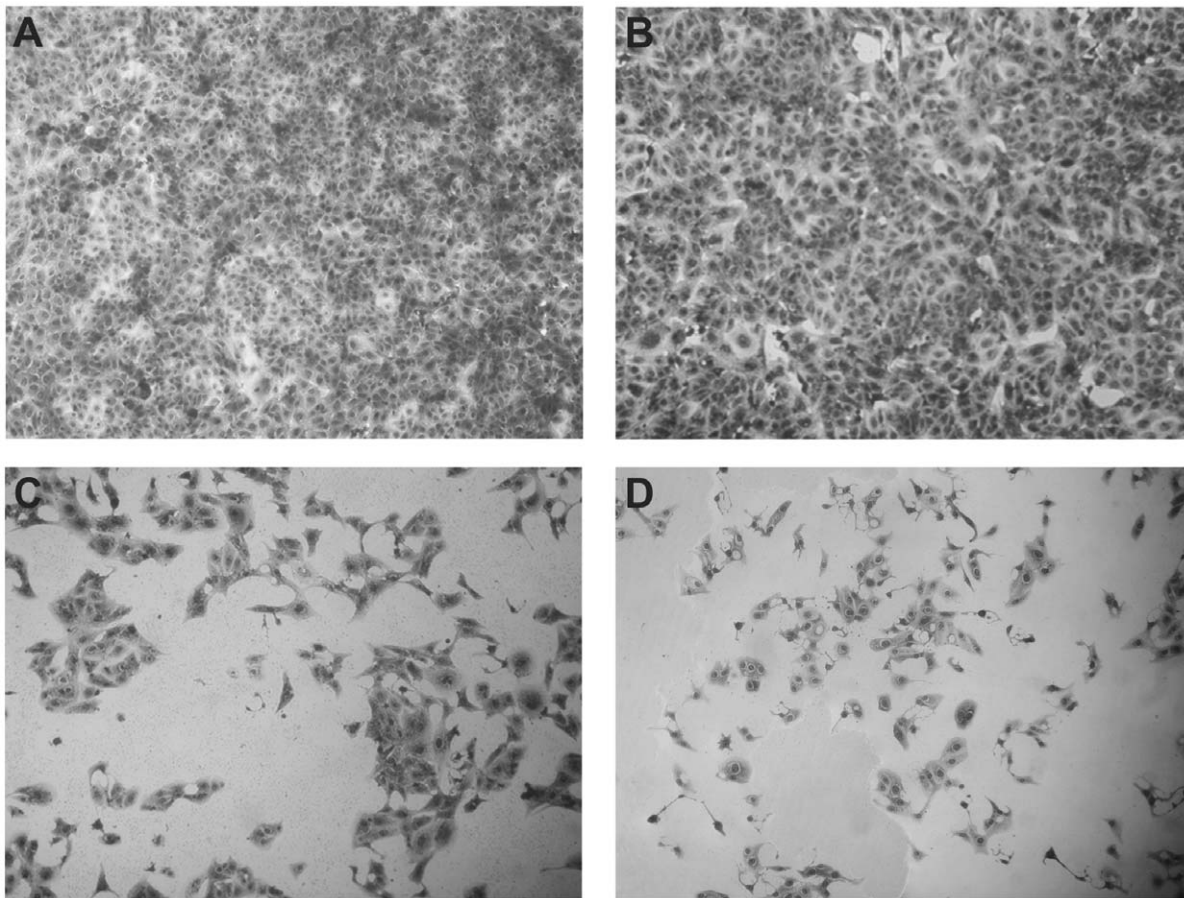

**Figure 6. Cytotoxicity on Vero Cells.** Vero cells were incubated with purified Stx2 (1 CD50) or transfected with pStx2 plasmid. After 48 h, cells were stained with Crystal Violet and analyzed by optical microscopy. Representative pictures using 200X original magnification are shown. **A.** Non-treated Vero cells. **B.** Cells transfected with the pGEM-T plasmid. **C.** Cells transfected with the pStx2 plasmid. **D.** Cells incubated with purified Stx2. doi:10.1371/journal.pone.0057128.g006

## Discussion

The main finding of the present article was the demonstration of the existence of putative eukaryotic promoter-like sequences located upstream of the genes encoding for the Stx2 A and B subunits. Moreover, the eukaryotic machinery was able to recognize these sequences and to initiate the transcription and translation leading to the synthesis of functional active Stx2-like protein.

Production of Shiga toxins is generally associated with prophage induction, which depends, among other factors, on the location of the integration site in the bacterial genome, which in turn depends on the phage type and bacterial host. In addition, it depends on the activation of the bacterial RecA protein, which causes autocleavage of the cI repressor encoded by the phage [26,27]. This mechanism allows the transcription from phage promoters, in addition to the  $p_R$  promoter, which controls the transcription of the *stxA* and *stxB* genes. In this context, factors that damage DNA or inhibit replication of the bacterial genome can activate the SOS system, and lead to prophage induction and production of large quantities of toxins.

Many of the prophages found in *E. coli* O157 strains are lambdoid phages, two of which, Sp15 and Sp5, carry the *stx1* and *stx2* genes, respectively [28]. In the prototype of the lambdoid family, lambda phage, Int and Xis proteins are needed to produce

an efficient excision of genomic DNA from the bacterial genome both *in vivo* and *in vitro* [29].

It is known that prophage release/replication and toxin production are correlated. One of the physiological extracellular signals that induce prophage activation is the presence of hydrogen peroxide released from human neutrophils after lysogenic bacteria uptake [30,28]. The excision process triggers the replication cascade and the generation of phage progeny. Furthermore, within the phagocytic vesicles, bacteria are under stress and the lytic cycle is activated. Some excised DNA molecules can be released into the cytoplasm from the phagocytic vesicle or phagolysosome, and then be incorporated to the nucleus. Otherwise, the free phage could transduce eukaryotic cells and the DNA phage could be transported to the nucleus [19].

On the other hand, several reports have demonstrated that bacteria could transfer plasmid-encoded genes to both bacterial and eukaryotic cells. In particular, gene transfer from *Salmonella* to mammalian macrophages and dendritic cells has been observed [31–33]. Likewise, when the lytic cycle of phages is activated in the phagolysosome after bacterial phagocytosis by macrophages, transfer of *stx* genes may occur [30,34]. Thus, intracellularly released DNA phages could use either one or both mechanisms of gene delivery, via the viral particle or by the naked DNA phage. Both of these mechanisms might transfer the *stx* gene to the cellular nuclei where it can be transcribed. In either situation, the eukaryotic transcriptional machinery could recognize the DNA

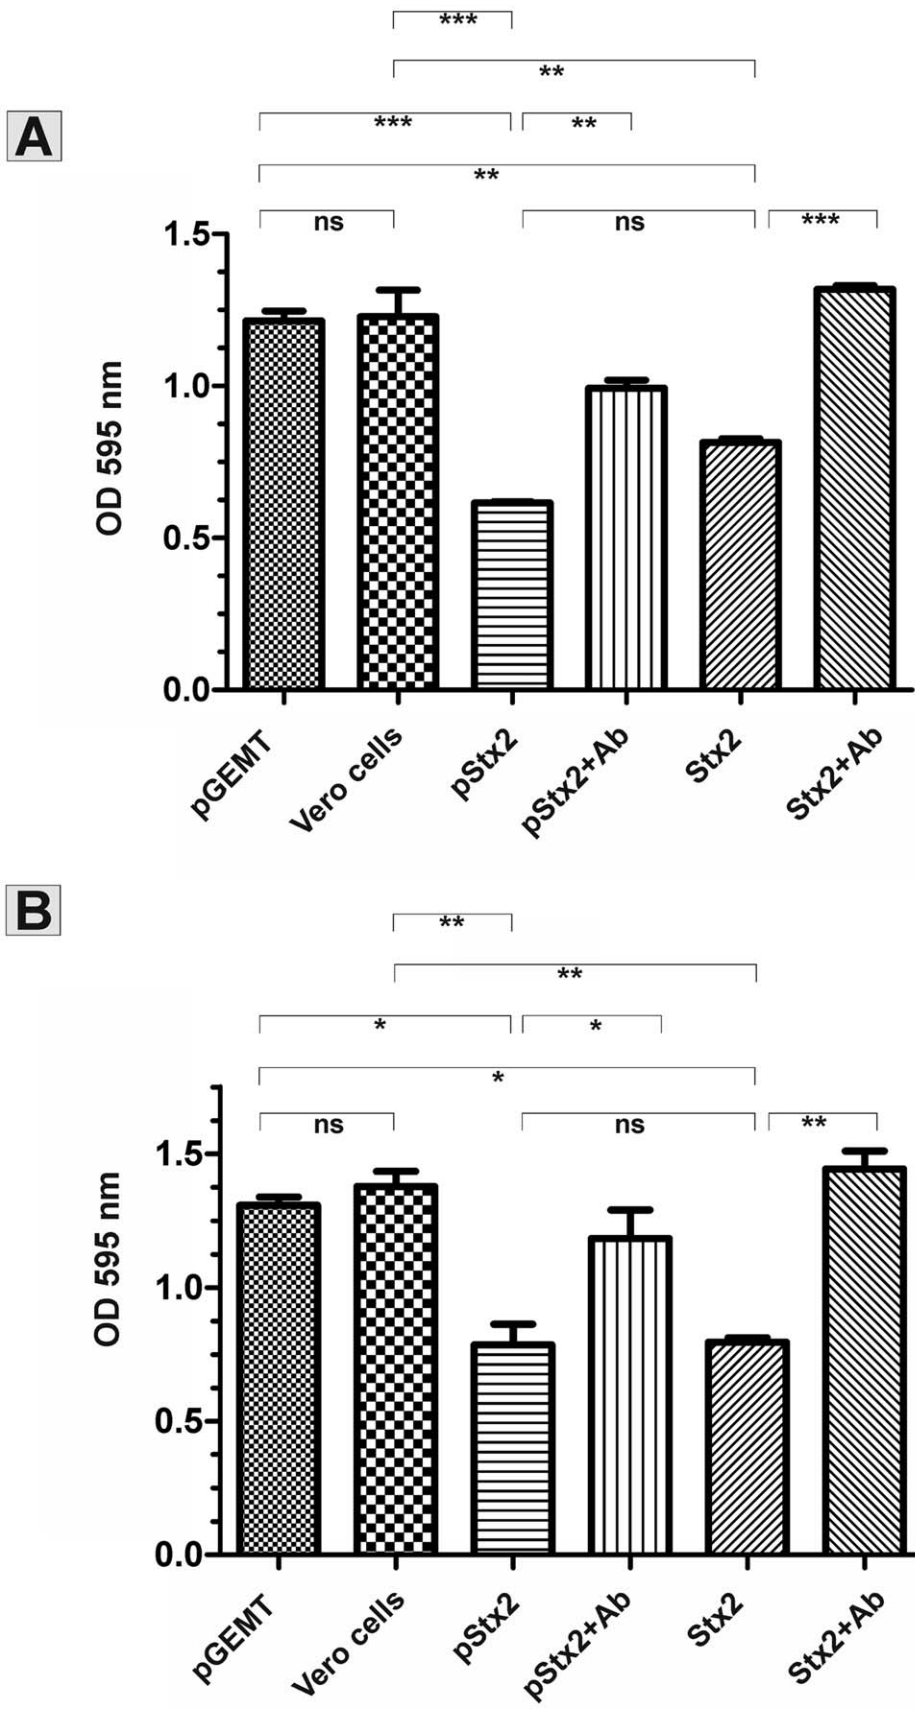

**Figure 7. Neutralization of the Stx2 cytotoxic activity.** Vero cells were incubated with a 1:1600 dilution of cellular extracts (Panel A) or a 1:400 dilution of culture supernatants (Panel B) derived from Vero cells transfected with pGEM-T (pGEM-T) or pStx2 (pStx2). As positive and negative



controls, Vero cells were incubated with 1 CD50 of Stx2 (Stx2) or in medium (Vero cells), respectively. To evaluate the specificity of the cytotoxicity, cytotoxic samples were pre-incubated with mouse polyclonal anti-Stx2 antibodies (pStx2+Ab; Stx2+Ab). After 48 h, cells were stained with Crystal Violet and OD<sub>595</sub> was measured as detailed in Materials and Methods. One-way ANOVA (Tukey's Multiple Comparison Test) was used to determine statistical significance between different samples. \*P<0.05. \*\*P<0.01. \*\*\*P<0.001.  
doi:10.1371/journal.pone.0057128.g007

sequences encoding Stx2 toxins. Binding motifs for eukaryotic transcription factors detected in the sequence of *stx2* and described in this article support this hypothesis.

In the present work, we explored the ability of mammalian cells carrying *stx2* coding DNA to produce Stx2, constituting an alternative Stx2 source during the course of the EHEC infection.

In a previous report, we have shown that the B subunit of Stx2 is expressed in the eukaryotic environment without the need of an additional eukaryotic promoter, involving probably its own upstream sequences [23].

In mammalian cells, transcriptional regulation requires the cooperation of multiple factors and specific sequences (cis-regulatory elements), including promoters, enhancers and silencers. The structure of the eukaryotic core promoter contains the TATA box, BRE (TFIIB recognition element), MTE (Motif Ten Element), DPE (Downstream Promoter Element), Inr (Initiator) and DCE (Downstream Core element) sequences, among others. Very often, mammalian core promoters contain CG-rich sequences called CpG islands or a mix of different motifs. The Sp1 binding site is often found in this type of core promoters [35].

The initiation of transcription in the eukaryotic environment can occur over a single start site (focused core promoter) or over distinct start sites into a short region (dispersed core promoter), depending on which binding motifs are present. Focused core

promoters are mainly related to the TATA box, Inr and DPE motifs, whereas dispersed core promoters are related to CpG island motifs [36–39].

*In silico* analyses of the *stx2* gene suggest the presence of different typical core promoter regulatory sequences. We focused only in the putative promoter sequences pr1 and pr7 that are located upstream of the *stx2A* and *stx2B* ORFs respectively (Figure 1), because if functional, they allow the synthesis of the complete sequences of A and B subunits respectively. A detailed bioinformatic analysis using transcription factor binding site databases and different servers led to the detection of several eukaryotic transcription factor binding motifs. In the pr1 putative promoter sequence, we detected five binding sites: MEB-1, GATA-1 and TATA box (partially overlapped with each other), and Sp1 and NF-1 (overlapped with TSS) (Figure 1). In the pr7 putative promoter sequence, we detected three binding sites: TEF and TATA box (partially overlapped), and HNF-3B. Based on this analysis, the pr1 and pr7 sequences could be acting as putative sequences in a eukaryotic context with potential promoter activity for the A and B subunits, respectively. Monolayers of 293T cells transfected with pr1-eGFP and pr7-eGFP showed GFP expression, demonstrating that eukaryotic cells should recognize both sequences as functional promoters. Although TATA box is not the only one eukaryotic transcription factor binding sites found, it

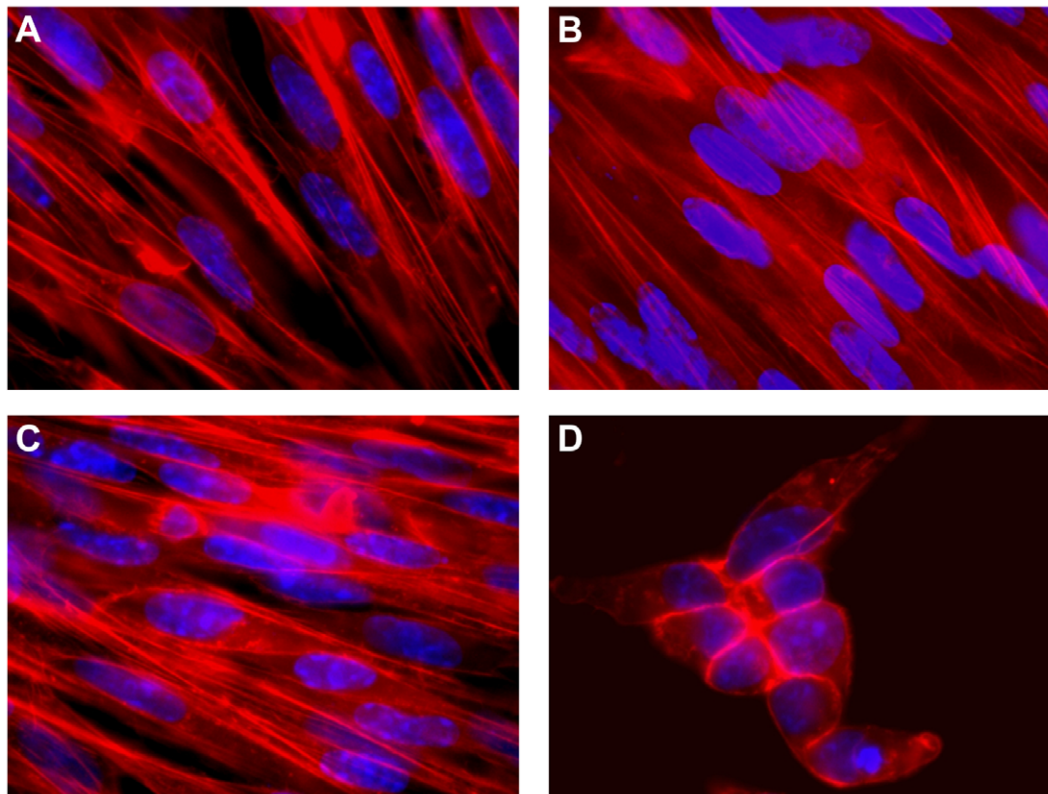

**Figure 8. Cytotoxicity on BHK cells.** BHK cells were incubated with purified Stx2 (1 CD50) or transfected with the pStx2 plasmid. After 48 h, cells were stained with DAPI and phalloidin-TRITC and analyzed by fluorescence microscopy. Original magnification 600X. **A.** Non-treated BHK cells. **B.** Cells transfected with pGEM-T. **C.** Cells incubated with purified Stx2. **D.** Cells transfected with the pStx2 plasmid.  
doi:10.1371/journal.pone.0057128.g008

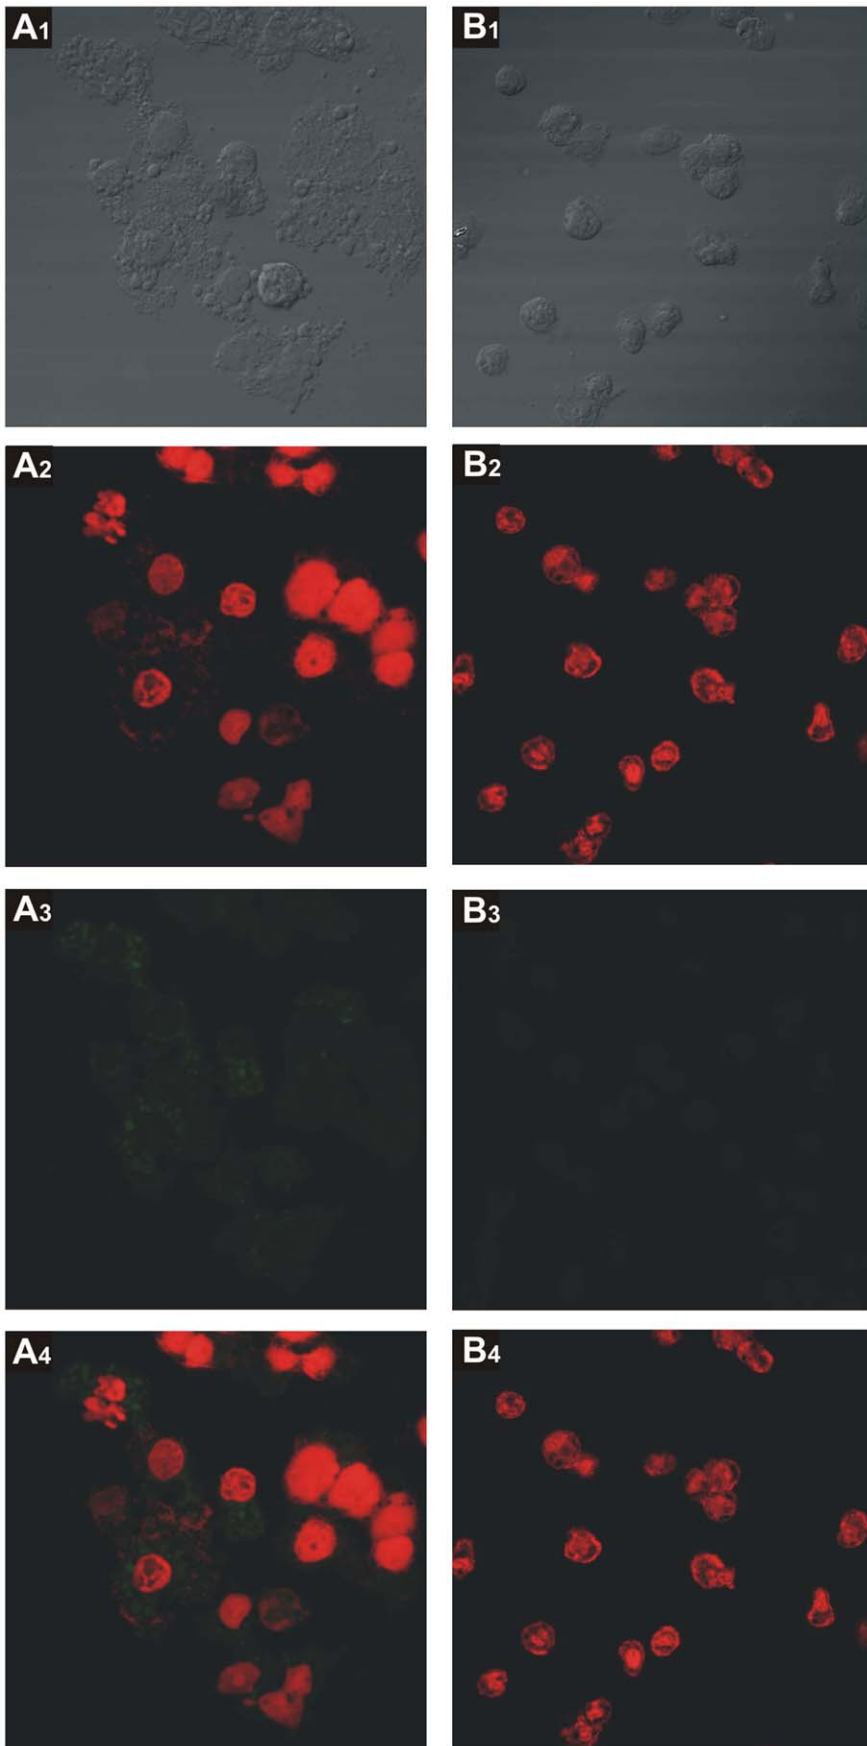

**Figure 9. Transduction of THP-1 cells differentiated to macrophages by bacteriophage 933W.** THP-1 cells PMA-differentiated to macrophages were transduced with  $\phi\Delta\text{TOX-GFP}$ . After 3 h, cells were analyzed by confocal microscopy, using 600X magnification. Green fluorescence photos were taken with 400 ms of exposure and 1 of gain. Numbers 1, 2, 3, 4 correspond to images visualized with white light, red filter, green filter and merge between green and red filter, respectively. **A.** Cells transduced with  $\phi\Delta\text{TOX-GFP}$ . **B.** Non-treated cells. doi:10.1371/journal.pone.0057128.g009

is known that TBP (TATA binding protein) along with other TBP-associated factors, make up the transcription Factor II D (TFIID), a general transcription factor that in turn makes up part of the RNA polymerase II pre-initiation complex [40]. Because TBP is one of the few proteins in the pre-initiation complex that binds DNA in a sequence-specific manner, it helps to position RNA polymerase II over the transcription start site of the gene. GFP expression was not observed when we transfected 293T cells with pr1 $\Delta\text{TATA-eGFP}$  or pr7 $\Delta\text{TATA-eGFP}$ , suggesting that this sequence plays a critical role in the promoter activity of the putative promoters. However, these results are not enough to attribute to TATA box the total role in driving Stx2 expression. Further studies will be necessary to fully define the role of the other mammalian transcription factor binding sites present in the Stx2 sequence.

Moreover, Vero cells transfected with pStx2 produced an active Stx2-like protein that was specifically detected or neutralized by anti-Stx2 antibodies. In addition, the linear *stx2* sequence was still able to induce cytotoxicity in Vero cells, discarding the presence of a cryptic promoter activity in the pGEMT backbone. The less cytotoxicity observed comparing the linear *stx2* sequence with pStx2 is probably due to the lower efficiency of transfection between linear DNA sequences and supercoiled plasmid.

It is known that Stx2 binds to its specific receptor on mammalian cells, the globotriaosyl ceramide (Gb<sub>3</sub>), to exert its cytotoxic effects. However, Gb<sub>3</sub> expression is insufficient to confer sensitivity to Stx2, implying that other key factors, such as toxin-receptor internalization or intracellular degradation, are important for its effect [41]. The data published so far suggest that Stx2 toxins need to traverse the cell membrane to exert their effects on protein synthesis.

The toxin binds to Gb<sub>3</sub> receptors and it is internalized through clathrin-dependent and -independent mechanisms. Once internalized, the toxin can follow one of several routes. The fatty acid chain composition in the receptor, rather than the toxin itself, contains the trafficking signal necessary to translocate the toxin from the membrane to the cytosol. Along this intracellular way, the A and B subunits of Stx2 disassociate, unfold, and the cleavage of the A subunit into the A1 and A2 subunits triggers its enzymatic activity [42,43].

Vero and BHK cells transfected with pStx2 showed different cytotoxic profiles probably due to their different toxin sensitivity. Vero cells transfected with pStx2 showed high cytotoxicity, similar to that observed when cells were incubated with exogenous recombinant Stx2.

Moreover, supernatants and cytoplasmic fractions from Vero cells transfected with pStx2 were able to induce a specific cytotoxic effect when they were added to naïve Vero cells. These results suggest that Stx2 is synthesized and released by Vero cells, acting in autocrine and paracrine ways in other non-transfected Vero cells, probably through the interaction with the Gb<sub>3</sub> receptor present in the membrane. Indeed, it is possible that different and alternative mechanisms were acting simultaneously.

On the other hand, BHK cells transfected with pStx2 showed no significant lysis, but a clear Stx2 cytotoxic effect was observed on the actin cytoskeleton. These results probably reflected the low sensitivity of BHK cells to exogenous Stx2, due to the low Gb<sub>3</sub> expression and/or their different fatty acid composition, but

showed the Stx2 effect when it is produced intracellularly. Similarly, Nakagawa *et al.* [44] also reported cytotoxic effects in NIH3T3 and HeLa cells transfected with the Stx1A or Stx1B subunits, both cloned into pcDNA3.1 vectors. However, they observed no morphological changes or DNA fragmentation upon the addition of recombinant Stx1B protein (monomeric form) to NIH3T3 and HeLa cell cultures. The cells transfected with the *stx1B* gene became apoptotic with DNA fragmentation, whereas the cells transfected with the *stx1A* gene were found to be necrotic but without signs of DNA fragmentation.

Moreover, actin morphological changes in macrophages infected with Stx-producing *Escherichia coli* O157:H7 have also been described [45]. Interestingly, in this report the authors suggested that the Stx released by the bacteria directly into the cytoplasm is responsible for the actin rearrangement in macrophages.

In conclusion, the capacity of mammalian cells to transcribe and translate *stx2* genes could have important pathological implications. First, it could contribute to the entry of Shiga toxins into the bloodstream. Secondly, the large numbers of inflammatory cells (macrophages and/or neutrophils) present during the infection process may release biologically active Stx2 close to target endothelial cells. Additionally, as preliminary data, we observed that purified  $\phi\Delta\text{TOX-GFP}$  was able to transduce the differentiated macrophagic THP-1 human cell line supporting our hypothesis that 933W bacteriophage could be able to transduce mammalian cells *in vivo*.

Thus, this alternative mechanism would not require a high blood concentration of Stx2 to be effective. In this regard, it has been recently demonstrated that a concentration as low as 10 fM of Stx2 is able to induce ribosome damage and to modulate selected cell signaling pathways that change cellular functions [46]. Understanding host-pathogen interactions is fundamental to develop vaccines and new specific therapeutic agents.

## Materials and Methods

### *In silico* Analysis of the *stx2* Sequence

In order to detect eukaryotic transcription factor binding sites in the *stx2* sequence, the putative promoter was analyzed with Neural Network Promoter Prediction v2.2 ([http://www.fruitfly.org/seq\\_tools/promoter.html](http://www.fruitfly.org/seq_tools/promoter.html)), which contains standardized data sets of human and *Drosophila melanogaster* genes. The putative promoters pr1 and pr7 were analyzed with the following server: AliBaba2.1 (<http://www.gene-regulation.com/pub/programs/Alibaba2>). The analysis was performed using the binding sites collected in TRANSFAC 4.0 database and default parameters (Pairsim to known sites: 50; Mat. width in bp: 10; minimum number of sites: 4; Minimum matrix conservation: 75%; Similarity sequence to matrix: 1%; Factor class level: 4).

### Plasmid Constructions

**pStx2.** The *stx2* complete sequence was amplified by PCR from total DNA from *E. coli* O157:H7 C600 (933W), using the primers Stx2Fw (5'-GAATTCATTATGCGTTGTTAG-3') and Stx2R (5'-GAATTCCTCAGTCATTATTAAGT-3'), both containing an EcoRI restriction site [23]. The resulting fragment (1413 bp) was cloned in a pGEMT easy vector (PROMEGA Inc),

generating the plasmid pStx2. This plasmid was replicated in *E. coli* DH5 $\alpha$  competent cells.

As an additional control pStx2 was digested using EcoRI and the *stx2* complete sequence was gel purified, and used to transfect Vero cells.

**pr1-eGFP.** The pr1 motif localized immediately upstream of the *stx2A* open read frame (ORF) was amplified by PCR from the pStx2 construction, using the primers Stx2Fw1 (5'-GCTCTAGACATGTCATATTTATTTACCAGGCTCGC-3') and Stx2R1 (5'-CCCCAAGCTTATACAGGTGTTCTTTTGGC-3'), containing restriction sites PciI-XbaI and HindIII respectively. PCR fragment was digested with PciI and HindIII. The plasmid pEGFP-N3 was digested with the same enzyme in order to eliminate the wild CMV promoter (Clontech Laboratories, CA, USA). PCR fragment and the plasmid, digested, were ligated and transformed in *E. coli* DH5 $\alpha$  competent cells. The construction was digested with PciI restriction enzyme to obtain the linear sequence. All restriction enzymes used were purchased from Fermentas International Inc.

**pr7-eGFP.** The pr7 motif localized immediately upstream of the *stx2B* ORF was amplified by PCR from the pStx2 construction using the primers Stx2Fw7 (5'-GCTCTAGACATGTTACAGCTGCAGCGTTTCTGAAC-3') and Stx2R7 (5'-CCCCAAGCTTTCTTCTTCATGCTTAACTCCT-3'), containing restriction sites PciI-XbaI and HindIII respectively. PCR fragment was digested with PciI and HindIII. The plasmid pEGFP-N3 was digested with the same enzyme in order to eliminate the wild CMV promoter (Clontech Laboratories, CA, USA). PCR fragment and the plasmid, digested, were ligated and transformed in *E. coli* DH5 $\alpha$  competent cells. The construction was digested with the PciI restriction enzyme to obtain the linear sequence.

**$\Delta$ pr-eGFP.** The plasmid pEGFP-N3 was digested with PciI and HindIII, filled in with the Klenow fragment (PROMEGA Inc.) and re-ligated as negative control.

**pr1 $\Delta$ TATA-eGFP and pr7 $\Delta$ TATA-eGFP.** Complementary oligonucleotides (Macrogen Inc., Seoul, Republic of Korea) in which TATA box sequence was replaced by BamHI restriction site were hybridized (R1-TATAf 5'-CATGTTACCAGGCTCGCTTTTGCGGGCCTTGGATCCATCTGCGCCGGGTCTGTGCTGATTACTTCAGCCAAAAGGAACACCTGTATA-3', R1-TATAr 5'-AGCTTATACAGGTGTTCTTTTGCTGAGTAATCAGCACCAGACCCGGCGCAGATGGATCCAAGGCCCGCAAAAAGCGAGCCTGGTAA-3'; R7-TATAf 5'-CATGTTACAGCTGCAGCGTTTCTGAACAGAAAGTCACAGTGGATCCATACAACGGGTAAATAAAGGAGTTAAGCATGAAGAAGAA-3', R7-TATAr 5'-AGCTTTCTTCTTCATGCTTAACTCCTTTATTTACCCGTTGTATGGATCCACTGTGACTTTCTGTTCAGAAACGCTGCAGCTGTAA-3'). pr1-eGFP and pr7-eGFP were digested with PciI and HindIII and ligated to the pr1 $\Delta$ TATA or pr7 $\Delta$ TATA fragment obtaining pr1 $\Delta$ TATA-eGFP and pr7 $\Delta$ TATA-eGFP respectively.

### Stx2 Preparation

The toxin was purified as reported previously [23]. Briefly, *E. coli* JM109 transformed with plasmid pGEMT-Stx2 was used to express Stx2 protein. Bacteria were grown in Luria broth overnight in the presence of ampicillin (50  $\mu$ g/ml). Cells were broken by ultrasonic treatment, centrifuged and the supernatant was treated with ammonium sulfate at 70% saturation. The precipitate was collected by centrifugation, resuspended in 3 ml of phosphate-buffered saline (PBS), and dialyzed with the same buffer for 24 h. Total protein concentration was determined by standard methods.

Stx2 concentration was determined with Ridascreen<sup>®</sup> Verotoxin kit (R-biopharm AG, Darmstadt, Germany). We calculated that 1CD50 (cytotoxic dose that kills 50% of Vero cells) of Stx2 is equivalent to 670 pg of Stx2.

### Anti-Stx2 Polyclonal Antibodies

Balb/c mice were immunized with Stx2 toxoid. Stx2 toxoid was prepared by formalin treatment of Stx2 [47]. Briefly, 100  $\mu$ g of Stx2 (Phoenix Lab, Tufts University, Boston, MA) was incubated overnight in 2% formalin and then dialyzed extensively against PBS. Mice were immunized with 5  $\mu$ g of Stx2 toxoid emulsified in Freund's complete (initial immunization) or incomplete (subsequent immunizations) adjuvant. Mice received Stx2 toxoid biweekly intervals a minimum of three times.

### In vitro Evaluation of Shiga Toxin Production

Vero cells transfected with pStx2 or pGEMT were grown for 48 h. The supernatants were collected and the cells were harvested with 800  $\mu$ l RPMI and lysed by four freeze-thaw cycles. Serial two-fold dilutions of supernatants or lysates were tested for cytotoxic activity on Vero cells as previously described [48]. Briefly, Vero cells were grown in complete medium on microtiter plates. Aliquots (150  $\mu$ l) of serial two-fold dilutions of lysates and supernatants were added to each well containing 10<sup>4</sup> Vero cells. Cells were incubated for 48 h at 37°C in 5% CO<sub>2</sub>. Cells were washed, stained with crystal violet dye, and read on a Microwell System reader 230S (Organon, Teknika, OR) with a 570 nm filter.

The specificity of cytotoxicity was evaluated in parallel, by pre-incubating each sample with mouse anti-Stx2 polyclonal antibody (dilution 1/400) for 1 h at 37°C and for 1 h at 4°C. A positive control with purified Stx2 (1CD50) was carried out.

### Transfection Assays

BHK-21 (Syrian hamster kidney fibroblasts from the American Type Culture Collection) and Vero cells (kidney epithelial cells of the African Green Monkey) were grown in RPMI 1640 medium (EMEVE Microvet SRL Laboratories, Argentina), supplemented with 10% fetal bovine serum (Natocor, Argentina), 100 U/ml penicillin G sodium, 100  $\mu$ g/ml streptomycin sulphate, and 0.25  $\mu$ g/ml fungizone (GIBCO, Grand Island, NY, USA) (complete medium) to 4 $\times$ 10<sup>5</sup> cells/well in six-well culture plates (GBO, Germany), at 37°C in 5% CO<sub>2</sub>. Cells were washed twice with serum-free medium and transfected with Polyfect reagent (QIAGEN Inc, CA, USA). Briefly, 2.5  $\mu$ g of plasmid pStx2, linear *stx2* or pGEMT (PROMEGA Inc.) religated vector were mixed with 15  $\mu$ l of Polyfect reagent following the manufacturer's instructions. After 10 minutes, the cells were incubated with the transfection mix (DNA-polyfect) for 48 h using complete medium at 37°C in 5% CO<sub>2</sub>. The pStx2-transfected cells were analyzed by cytotoxic assay, or fixed for immunofluorescence analysis.

293T cells (human embryonic kidney cells) were transfected with supercoiled or linear peGFP constructions (pr1-eGFP, pr1 $\Delta$ TATA-eGFP, pr7-eGFP, pr7 $\Delta$ TATA-eGFP and  $\Delta$ pr-eGFP) as described above. Cells were analyzed by fluorescence microscopy.

### Analysis of Cytoskeletal Actin

BHK cells were grown on cover slips and transfected with pStx2 as previously described. After 48 hours, cells on cover slips were washed with PBS and fixed with PBS containing 1% p-formaldehyde (PFA) for 15 minutes at room temperature. Cells were washed three times with PBS for 5 minutes, permeabilized with PBS containing 0.25% Triton X100 for 15 minutes at room

temperature, and washed again three times with PBS for 5 minutes. Cells were stained with phalloidin-TRITC (Sigma-Aldrich, St. Louis, MO, USA) and DAPI (Molecular Probes-Invitrogen, CA, USA) according to the manufacturer's specifications. The samples were analyzed by fluorescence microscopy in a Nikon Eclipse TE2000 (NIS-Elements imaging software) equipped with a CCD camera.

### Immunofluorescence Assays

Vero cells were grown on cover slips, transfected with pStx2 or pGEMT vector and incubated for 48 h. As positive control, cells were incubated with purified Stx2 (100CD50) for 2 h at 37°C. Cells were washed with PBS, fixed with PBS containing 1% PFA for 15 minutes at room temperature and washed three times with PBS. Cells were permeabilized with 0.25% Triton X100 in PBS for 15 minutes at room temperature, washed again three times with PBS and incubated with block solution (Triton X100 0.25%, BSA 4%, PBS 1X) for 90 minutes at 37°C. Then, cells were incubated with mouse anti-Stx2 polyclonal antibody diluted 1/100 in block solution for 90 minutes at 4°C, washed five times with PBS and incubated with goat anti-mouse IgG-FITC antibody (dilution 1/2000) for 45 minutes at 4°C (Jackson ImmunoResearch Laboratories Inc., PA, USA). Finally, the samples were washed five times with PBS, stained with propidium iodide (PI) (Sigma-Aldrich) (5 µg/ml) and analyzed with FluoView™ FV1000 Confocal Microscope (Olympus). Excitation wavelengths were 488 nm for FITC and 543 nm for PI and a sequential mode was used. The numerical aperture was 1.42 on a 60X oil objective.

### In vitro Evaluation of the Ability of Bacteriophage 933W to Transduce THP-1 Differentiated Cells

C600: ΔTOX-GFP was generously provided by Dr Alison Weiss [14]. It is a non-pathogenic phage resulting from purified 933W bacteriophage in which *stx2* gene was replaced by *gfp* sequence. THP-1 cells were differentiated to macrophages by incubation with phorbol-12-myristate-13-acetate (PMA) during 48 h. Phages at a multiplicity of infection (M.O.I) equal to 1 were added to macrophages. Transduction of macrophages was enhanced by centrifugation at 1000 × g for 10 min at room temperature. After 10 min at 37°C, medium containing phage was removed and cells were washed twice with PBS and then incubated in complete medium. After 3 hours post infection, the

cells were examined by FluoView™ FV1000 Confocal Microscope (Olympus).

### Statistical Analysis

The significance of the difference between treatments was analyzed using (ANOVA with Tukey's post-test) with Prism 5.0 software (GraphPad Software), and the p value is indicated by asterisks in the figures.

### Ethics Statement

Experiments performed herein were approved by the (IMEX) Instituto de Medicina Experimental Care Committee in accordance with the principles set forth in the Guide for the Care and Use of Laboratory Animals (National Institute of Health, 1985).

### Supporting Information

**Figure S1 GFP activity driven by pr1ΔTATA-eGFP and pr7ΔTATA-eGFP.** 293 T cells were transfected with pr1ΔTATA-eGFP or pr7ΔTATA-eGFP. After 48 h, cells were analyzed by fluorescence microscopy using Nikon Eclipse TE2000 microscope equipped with a CCD camera, using 400X magnification. Green fluorescence photos were taken with 600 ms of exposure and 1 of gain. Numbers 1, 2, 3, 4 correspond to images visualized with white light, green filter, DAPI, merge between white light, green filter and DAPI respectively. **A.** Cells transfected with pr1ΔTATA-eGFP. **B.** Cells transfected with pr7ΔTATA-eGFP. (TIF)

### Acknowledgments

We would like to acknowledge Dr. Alison A. Weiss for the strain *E. coli* C600: ΔTOX-GFP which was used for the purification of φΔTOX-GFP. We are grateful to Professor Omar Coso for helpful discussions. MFB, MVR, GCF, MAI, PDG and MSP are members of the Research Career of CONICET (Consejo Nacional de Ciencia y Tecnología).

### Author Contributions

Conceived and designed the experiments: LVB MFB PDG MSP. Performed the experiments: LVB MFB MPM. Analyzed the data: LVB MFB MSP PDG. Contributed reagents/materials/analysis tools: CAP MVR GCF MI RJFB. Wrote the paper: LVB MFB PDG MSP.

### References

- Griffin PM, Tauxe RV (1991) The epidemiology of infections caused by *Escherichia coli* O157:H7, other enterohemorrhagic *E. coli*, and the associated hemolytic uremic syndrome. *Epidemiol Rev* 13: 60–98.
- Slutsker L, Ries AA, Greene KD, Wells JG, Hutwagner L, et al. (1997) *Escherichia coli* O157:H7 diarrhea in the United States: clinical and epidemiologic features. *Ann Intern Med* 126: 505–513.
- Caprioli A, Morabito S, Brugere H, Oswald E (2005) Enterohaemorrhagic *Escherichia coli*: emerging issues on virulence and modes of transmission. *Vet Res* 36: 289–311.
- Lopez EL, Prado-Jimenez V, O'Ryan-Gallardo M, Contrini MM (2000) Shigella and Shiga toxin-producing *Escherichia coli* causing bloody diarrhea in Latin America. *Infect Dis Clin North Am* 14: 41–65.
- Rivas M, Miliwebsky E, Chinen I, Deza N, Leotta GA (2006) The epidemiology of hemolytic uremic syndrome in Argentina. Diagnosis of the etiologic agent, reservoirs and routes of transmission. *Medicina* 66: 27–32.
- Thompson GS, Shimizu H, Homans SW, Donohue-Rolfe A (2000) Localization of the binding site for the oligosaccharide moiety of Gb3 on verotoxin 1 using NMR residual dipolar coupling measurements. *Biochemistry* 39: 13153–13156.
- Neely MN, Friedman DI (1998) Functional and genetic analysis of regulatory regions of coliphage H-19B: location of Shiga-like toxin and lysis genes suggest a role for phage functions in toxin release. *Mol Microbiol* 28: 1255–1267.
- Little JW (1995) The SOS regulatory system, p. 453–479. In Linn ECC, Lynch AS, editors. Regulation of gene expression in *Escherichia coli*. Georgetown, TX: R.G. Landis.
- Zhang X, McDaniel AD, Wolf LE, Keusch GT, Waldor MK, et al. (2000) Quinolone antibiotics induce Shiga toxin encoding bacteriophages, toxin production, and death in mice. *J Infect Dis* 181: 664–670.
- Teel LD, Melton-Celsa AR, Schmitt CK, O'Brien AD (2000) One of two copies of the gene for the activatable Shiga toxin type 2d in *Escherichia coli* O91:H21 strain B2F1 is associated with an inducible bacteriophage. *Infect Immun* 70: 4282–4291.
- Acheson DW, Reidl J, Zhang X, Keusch GT, Mekalanos JJ, et al. (1998) *In Vivo* Transduction with Shiga Toxin 1-Encoding Phage. *Infect Immun* 66: 4496–4498.
- Cornick NA, Helgerson AF, Mai V, Ritchie JM, Acheson DWK (2006) *In Vivo* Transduction of an Stx-Encoding Phage in Ruminants. *Appl Environ Microbiol* 72: 5086–5088.
- Schmidt H (2001) Shiga-toxin-converting bacteriophages. *Res Microbiol* 152: 687–695.
- Gamage SD, Strasser JE, Chalk CL, Weiss AA (2003) Nonpathogenic *Escherichia coli* can contribute to the production of Shiga toxin. *Infect Immun* 71: 3107–3115.
- Merril CR, Geier MR, Petricciani JC (1971) Bacterial virus gene expression in human cells. *Nature* 233: 398–400.
- Eguchi A, Akuta T, Okuyama H, Senda T, Yokoi H, et al. (2001) Protein transduction domain of HIV-1 Tat protein promotes efficient delivery of DNA into mammalian cells. *J Biol Chem* 276 (28): 26204–10.
- Zanghi CN, Sapinoro R, Bradel-Tretheway B, Dewhurst S (2007) A tractable method for simultaneous modifications to the head and tail of bacteriophage



- lambda and its application to enhancing phage-mediated gene delivery. *Nucleic Acids Res* 35(8): e59.
18. Clark JR, March JB (2004) Bacteriophage-mediated nucleic acid immunisation. *FEMS Immunol Med Microbiol* 40: 21–26.
  19. Lankes HA, Zanghi CN, Santos K, Capella C, Duke CM, et al. (2007) In vivo gene delivery and expression by bacteriophage lambda vectors. *J Appl Microbiol* 102: 1337–1349.
  20. Sapinoro R, Rodrigo S, Schlesinger J, Dewhurst S (2007) Fc receptor mediated, antibody-dependent enhancement of bacteriophage lambda-mediated gene transfer in mammalian cells. *Virology* 373: 274–286.
  21. Shimada O, Ishikawa H, Tosaka-Shimada H, Atsumi S (1999) Exocytotic secretion of toxins from macrophages infected with *Escherichia coli* O157. *Cell Struct Funct* 24: 247–253.
  22. Poirier K, Faucher SP, B eland M, Brousseau R, Gannon V, et al. (2008) *Escherichia coli* O157:H7 survives within human macrophages: global gene expression profile and involvement of the Shiga toxins. *Infect Immun* 76: 4814–4822.
  23. Bentancor LV, Bilen M, Brando RJ, Ramos MV, Ferreira LC, et al. (2009) A DNA vaccine encoding the enterohemorrhagic *Escherichia coli* Shiga-like toxin 2 A2 and B subunits confers protective immunity to Shiga toxin challenge in the murine model. *Clin Vaccine Immunol* 16: 712–718.
  24. George AA, Sharma M, Singh BN, Sahoo NC, Rao KV (2006) Transcription regulation from a TATA and INR-less promoter: spatial segregation of promoter function. *EMBO J* 25: 811–821.
  25. Takenouchi H, Kiyokawa N, Taguchi T, Matsui J, Katagiri YU, et al. (2004) Shiga toxin binding to globotriaosyl ceramide induces intracellular signals that mediate cytoskeleton remodeling in human renal carcinoma-derived cells. *J Cell Sci* 117: 3911–3922.
  26. Ptashne M (1992) A genetic switch: phage  $\lambda$  and higher organisms. Cambridge, MA: Cell Press.
  27. Ptashne M (2004) A genetic switch: phage lambda revisited, 3rd ed. Cold Spring Harbor, NY: Cold Spring Harbor Laboratory Press.
  28. Canchaya C, Proux C, Fournous G, Bruttin A, Br ussow H (2003) Prophage genomics. *Microbiol Mol Biol Rev* 67: 238–276.
  29. Gottesman S, Gottesman M (1975) Excision of prophage  $\lambda$  in a cell-free system. *Proc Natl Acad Sci USA* 72: 2188–2192.
  30. Wagner PL, Acheson DWK, Waldor MK (2001) Human neutrophils and their products induce Shiga toxin production by enterohemorrhagic *Escherichia coli*. *Infect Immun* 69: 1934–1937.
  31. Darji A, Guzm an CA, Gerstel B, Wachholz P, Timms KN, et al. (1997) Oral Somatic Transgene Vaccination Using Attenuated *S. typhimurium*. *Cell* 91: 765–775.
  32. Paglia P, Medina E, Arioli I, Guzman CA, Colombo MP (1998) Gene transfer in dendritic cells, induced by oral DNA vaccination with *Salmonella typhimurium*, results in protective immunity against a murine fibrosarcoma. *Blood* 92: 3172–3176.
  33. Gahan ME, Webster DE, Wesselingh SL, Strugnell RA, Yang J (2009) Bacterial Antigen Expression Is an Important Component in Inducing an Immune Response to Orally Administered Salmonella-Delivered DNA Vaccines *Plos One* 4(6): e6062.
  34. Geier MR, Merril CR (1972) Lambda phage transcription in human fibroblasts. *Virology* 47: 638–643.
  35. Baumann M, Pontiller J, Ernst W (2010) Structure and basal transcription complex of RNA polymerase II core promoters in the mammalian genome: an overview. *Mol Biotechnol* 45: 241–247.
  36. Orphanides G, Reinberg D (2002) A unified theory of gene expression. *Cell* 108: 439–451.
  37. Smale ST, Kadonaga JT (2003) The RNA polymerase II core promoter. *Annu Rev Biochem* 72: 449–79.
  38. Juven-Gershon T, Hsu JY, Theisen JW, Kadonaga JT (2008) The RNA polymerase II core promoter - the gateway to transcription. *Curr Opin Cell Biol* 20: 253–259.
  39. Juven-Gershon T, Kadonaga JT (2010) Regulation of gene expression via the core promoter and the basal transcriptional machinery. *Dev Biol* 339: 225–229.
  40. Lee TI, Young RA (2000) Transcription of eukaryotic protein-coding genes. *Annu Rev Genet* 34: 77–137.
  41. O’Loughlin EV, Robins-Browne RM (2001) Effect of Shiga toxin and Shiga-like toxins on eukaryotic cells. *Microbes Infect* 3: 493–507.
  42. Obrig TG, Moran TP, Brown JE (1987) The mode of action of Shiga toxin on peptide elongation of eukaryotic protein synthesis. *J Biochem* 244: 287–294.
  43. Endo Y, Tsurugi K, Yutsudo T, Takeda, Ogasawara T, et al. (1988) Site of action of a Vero toxin (VT2) from *Escherichia coli* O157:H7 and of Shiga toxin on eukaryotic ribosomes. RNA N-glycosidase activity of the toxins. *Eur J Biochem* 171: 45–50.
  44. Nakagawa I, Nakata M, Kawabata S, Hamada S (1999) Regulated expression of the Shiga toxin B gene induces apoptosis in mammalian fibroblastic cells. *Mol Microbiol* 33: 1190–1199.
  45. Shimada O, Ishikawa H, Tosaka-Shimada, Atsumi S (1999) Rearrangements of actin cytoskeleton during infection with *Escherichia coli* O157 in macrophages. *Cell Struct Funct* 24: 237–246.
  46. Petruzzello-Pellegrini TN, Yuen DA, Page AV, Patel S, Soltyk AM, et al. (2012) The CXCR4/CXCR7/SDF-1 pathway contributes to the pathogenesis of Shiga toxin-associated hemolytic uremic syndrome in humans and mice. *J Clin Invest* 122(2): 759–766.
  47. Mukherjee J, Chios K, Fishwild D, Hudson D, O’Donnell S, et al. (2002) Human Stx2-specific monoclonal antibodies prevent systemic complications of *Escherichia coli* O157:H7 infection. *Infect Immun* 70: 612–619.
  48. Karmali MA, Petric M, Lim C, Cheung R, Arbus GS (1985) Sensitive method for detecting low numbers of verotoxin-producing *Escherichia coli* in mixed cultures by use of colony sweeps and polymyxin extraction of verotoxin. *J Clin Microbiol* 22: 614–619.
